# Supplementary material for: Efficient Generation of iPS Cells from Skeletal Muscle Stem Cells
Source: PLOS journal article supplement (doi:10.1371/journal.pone.0026406), 2011-10-18

FIGURE S1

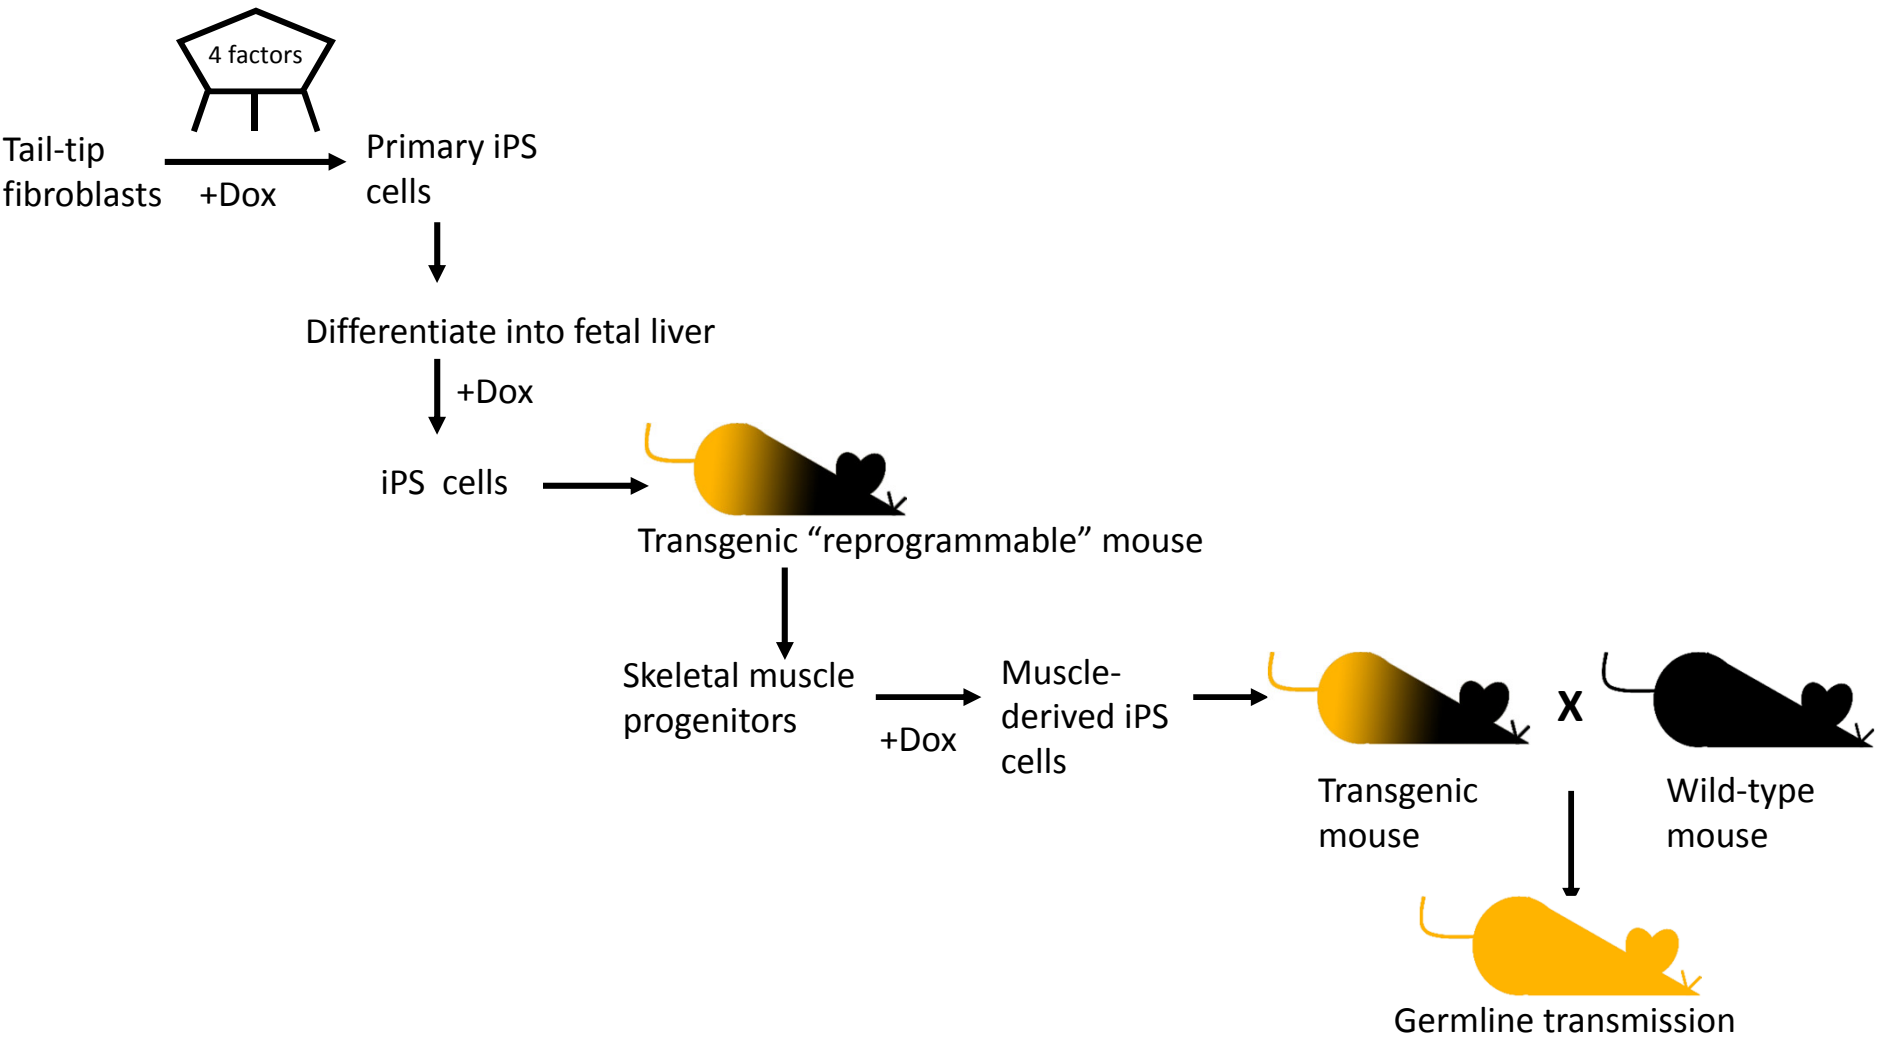

Supplement: S1 (10.1371/journal.pone.0026406.s001) [file journal.pone.0026406.s001]
