# Supplementary material for: Efficient Generation of iPS Cells from Skeletal Muscle Stem Cells
Source: PLOS journal article supplement (doi:10.1371/journal.pone.0026406), 2011-10-18
Supplement: S2 (10.1371/journal.pone.0026406.s002) [file journal.pone.0026406.s002]

FIGURE S2

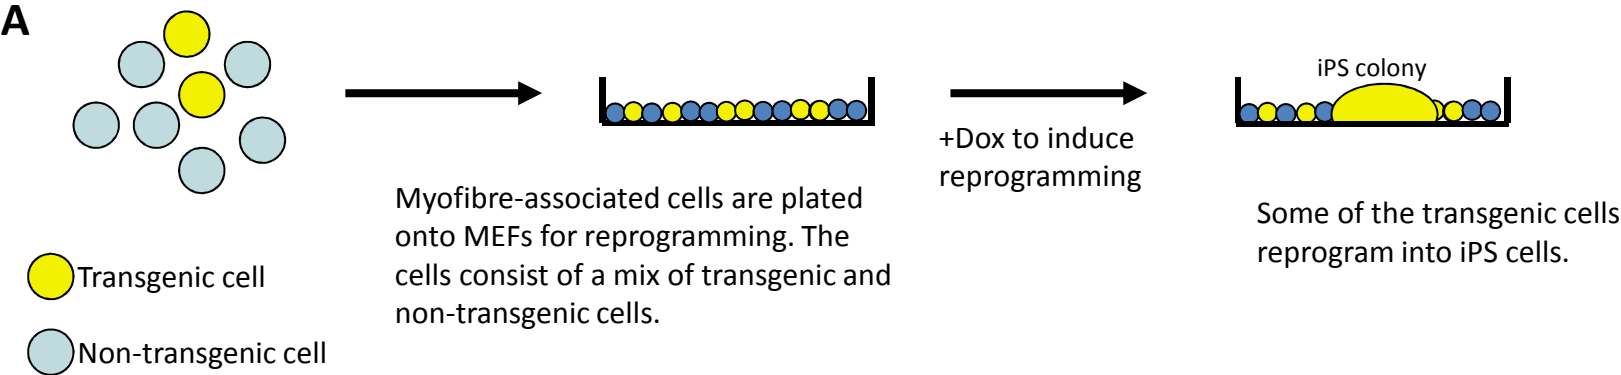

**B**

| Cell type                                                                                | Efficiency of reprogramming X%<br>(No of colonies / No of cells seeded) |                   |
|------------------------------------------------------------------------------------------|-------------------------------------------------------------------------|-------------------|
|                                                                                          | Expt 1                                                                  | Expt 2            |
| Skeletal muscle progenitors<br>(Sca1- CD45- Mac1- B1-integrin CXCR4-;<br>“SMPs” in text) | 0.7%<br>(15/2100)                                                       | 2.8%<br>(38/1352) |
| Mesenchymal progenitors<br>(Sca1+ CD45- Mac1-;<br>“Sca1+ cells” in text)                 | 0.01%<br>(2/2100)                                                       | 0.07%<br>(1/1352) |
| Myoblast-containing population<br>(Sca1- CD45- Mac1- CXCR4-;<br>“CXCR4- cells” in text)  | ND                                                                      | 0%<br>(0/1352)    |
